# Supplementary material for: Sustaining Biomaterials in Bioeconomy: Roles of Education and Learning in Mekong River Basin
Source: MDPI journal article supplement (doi:10.3390/f12121670), 2021-11-30
Supplement: s1 [file s1]

# Supplementary

**Table S1.** The detail of participants in brainstorming sessions during 2018–2020 in MRB.

| MRB Country | Dates of brainstorming sessions | Participants         |        |
|-------------|---------------------------------|----------------------|--------|
|             |                                 | Background/Expertise | Number |
| China       | June 4–7, 2019                  | Grower's association | 1      |
|             |                                 | Government officer   | 4      |
|             |                                 | Educator             | 4      |
| Laos        | November 8–10, 2018             | Government officer   | 14     |
|             |                                 | Educator             | 5      |
| Thailand    | July 9, 2020                    | Grower               | 4      |
|             |                                 | Grower's association | 1      |
|             |                                 | Government officer   | 11     |
|             |                                 | Educator             | 3      |
|             | August 28, 2020                 | Educator             | 35     |
|             | December 23–24, 2020            | Grower's association | 1      |
|             |                                 | Government officer   | 15     |
|             |                                 | Educator             | 9      |
